# Supplementary material for: Crystal chemistry and predicted ionic conductivity of hydrothermally synthesized Na9Zn2(PO4)4Cl
Source: Royal Society of Chemistry journal article supplement (doi:10.1039/d3ce01242e), 2024-01-01
Supplement: d3ce01242e1.pdf [file d3ce01242e1.pdf]

**Table S1.**  $(\text{Na}_9\text{Cl})\text{Zn}_2(\text{PO}_4)_4$ . Atomic coordinates and equivalent isotropic displacement parameters ( $\text{\AA} \times 10^3$ ).  $U(\text{eq})$  is defined as one third of the trace of the orthogonalized  $U_{ij}$  tensor.

| Atom | $x/a$        | $y/b$       | $z/c$       | $U(\text{eq})$ |
|------|--------------|-------------|-------------|----------------|
| Zn   | 0.29757(3)   | 0.92352(2)  | 0.17799(2)  | 0.00709(6)     |
| Cl   | 0.5          | 0.0         | 0.5         | 0.01181(10)    |
| P1   | 0.82692(7)   | 0.12466(4)  | 0.20034(4)  | 0.00463(7)     |
| P2   | 0.37657(7)   | 0.59981(4)  | 0.24772(4)  | 0.00560(8)     |
| Na1  | -0.10655(12) | 0.81416(7)  | 0.40323(7)  | 0.00911(12)    |
| Na2  | 0.26671(12)  | 0.22743(7)  | -0.01873(7) | 0.00922(12)    |
| Na3  | 0.0          | 0.5         | 0.5         | 0.01194(17)    |
| Na4  | -0.18345(12) | 0.44183(7)  | 0.11932(8)  | 0.01215(13)    |
| Na5  | 0.54123(13)  | 0.69817(7)  | 0.61839(8)  | 0.01465(14)    |
| O1   | 0.8764(2)    | 0.16977(12) | 0.05454(12) | 0.0076 (2)     |
| O2   | 0.9505(2)    | 0.97142(11) | 0.22262(12) | 0.0065(2)      |
| O3   | 0.4838(2)    | 0.73908(12) | 0.19445(13) | 0.0088(2)      |
| O4   | 0.5175(2)    | 0.10337(12) | 0.17572(12) | 0.0076(2)      |
| O5   | 0.9441(2)    | 0.25085(12) | 0.33979(12) | 0.0092(2)      |
| O6   | 0.5950(2)    | 0.56759(14) | 0.38355(14) | 0.0150(2)      |
| O7   | 0.3256(2)    | 0.46270(12) | 0.11369(13) | 0.0135(2)      |
| O8   | 0.1161(2)    | 0.63387(13) | 0.29349(15) | 0.0167(2)      |
